# Supplementary material for: Gastrodin overcomes chemoresistance via inhibiting Skp2-mediated glycolysis
Source: PubMed Central journal article supplement (PMC10543462; doi:10.1038/s41420-023-01648-y), 2023-10-02

# Figure 1

## G

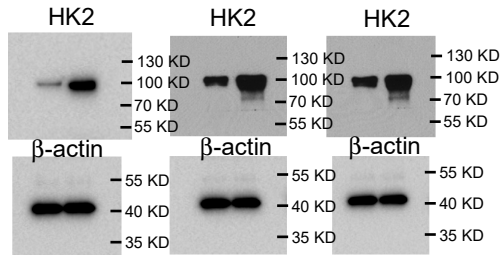

## H

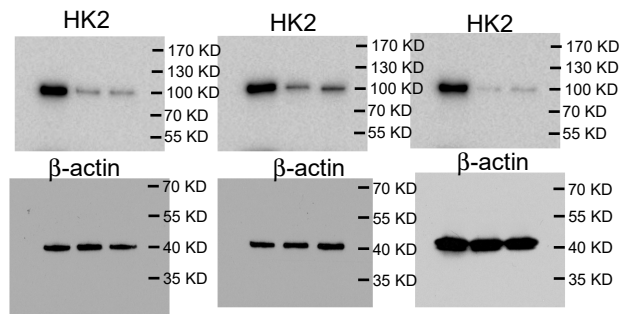

# Figure 3

## F

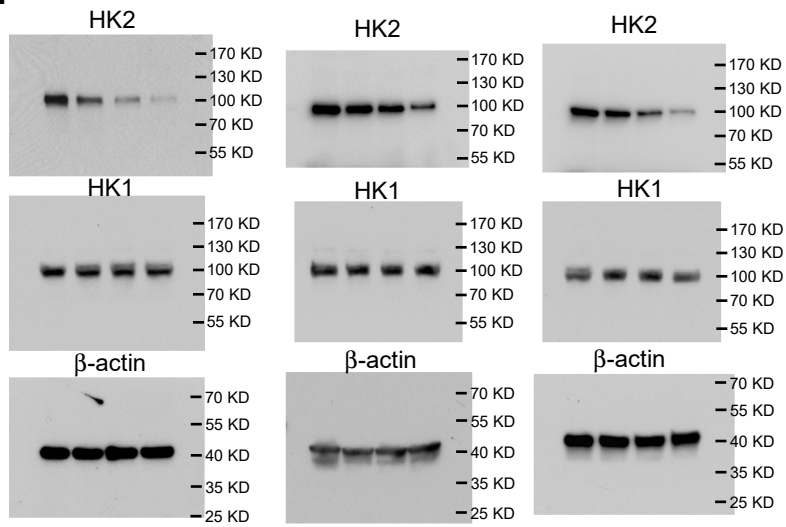

Figure 4

E

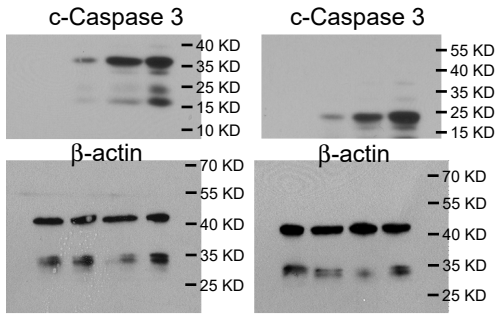

G

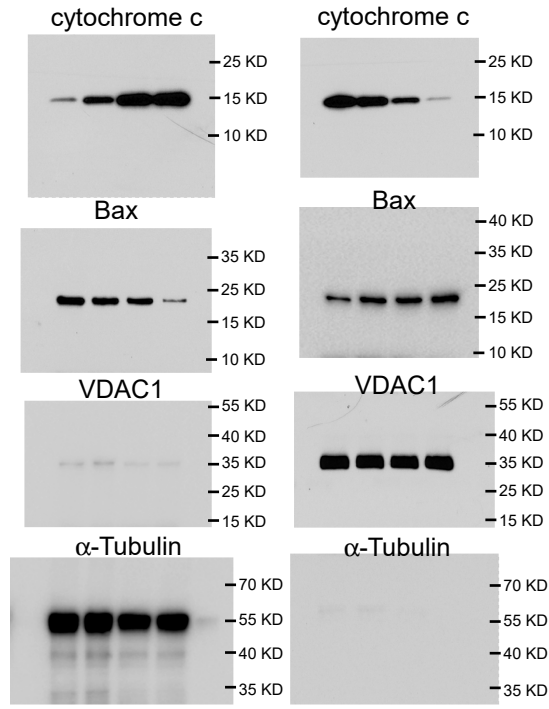

H

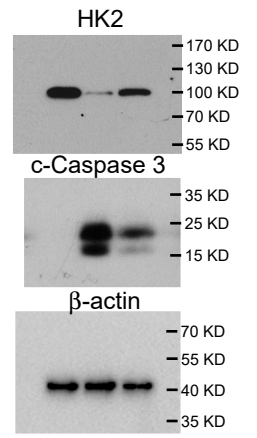

K

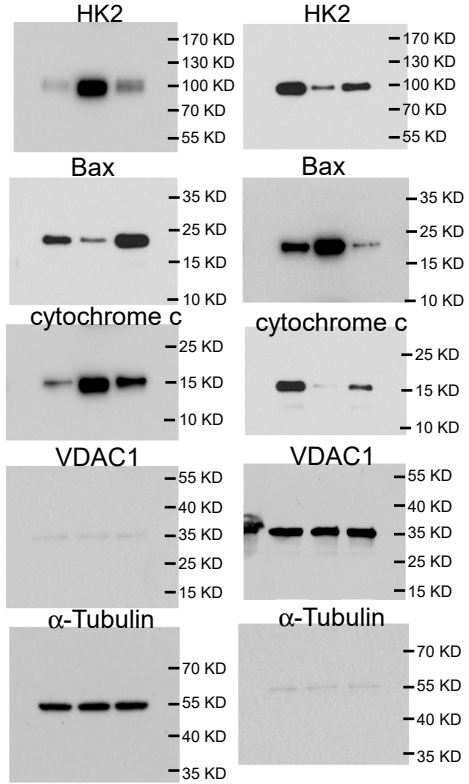

Figure 5

A

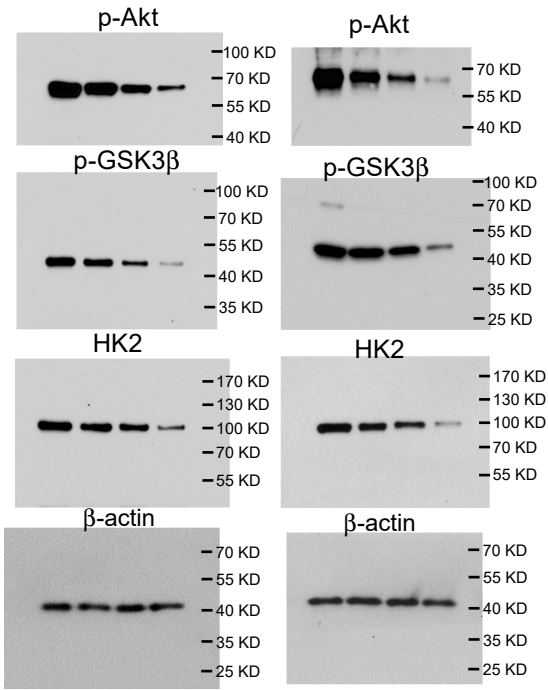

B

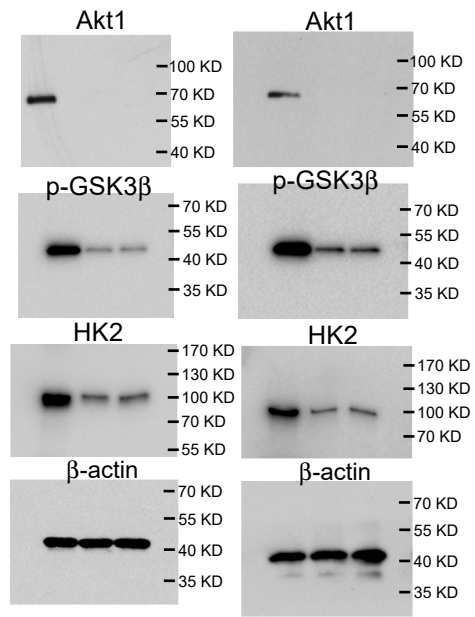

E

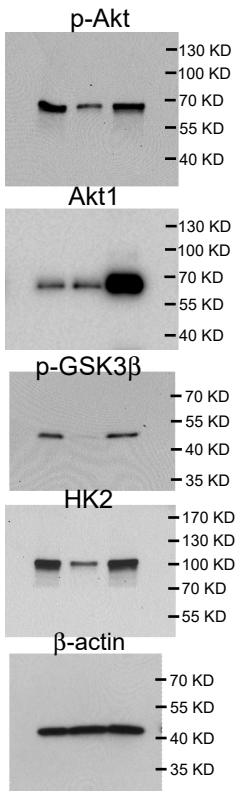

I

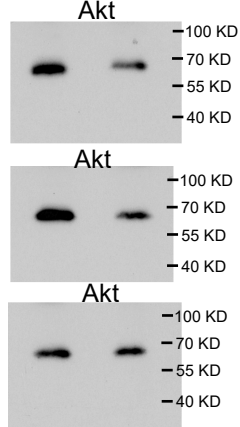

J

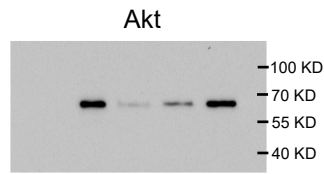

Figure 6

A

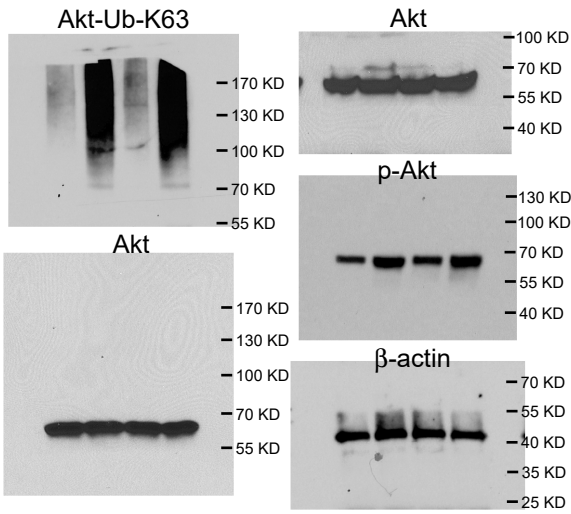

B

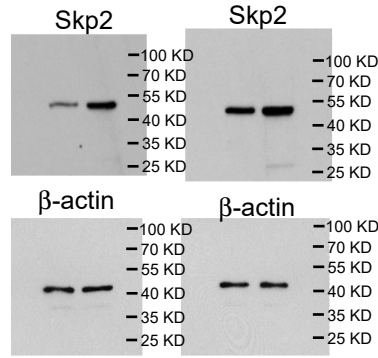

C

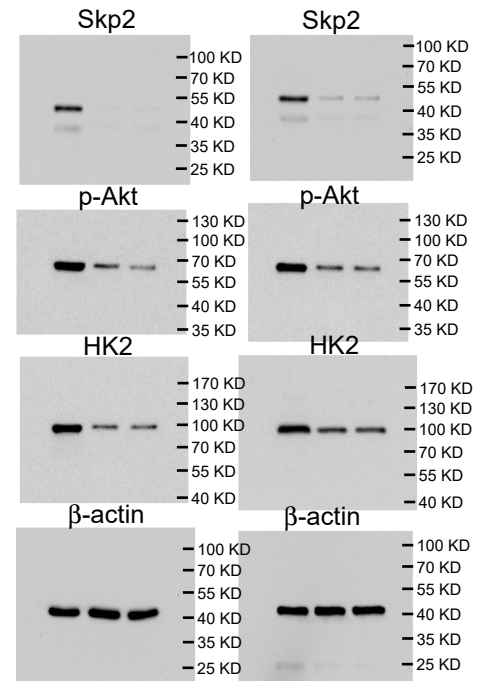

D

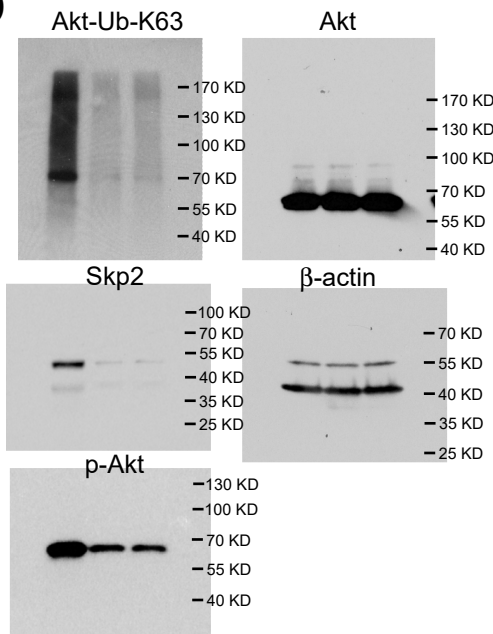

H

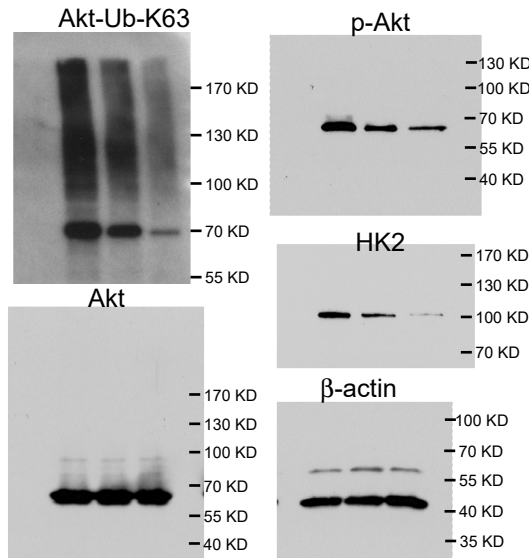

I

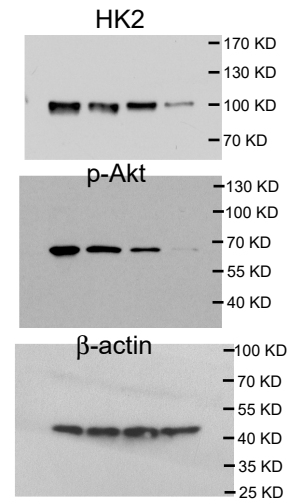

Figure S1

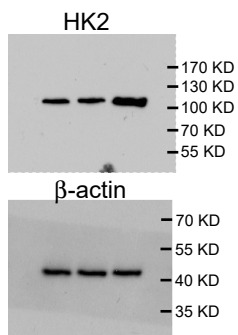

Supplement: 41420_2023_1648_MOESM2_ESM.pdf [file 41420_2023_1648_MOESM2_ESM.pdf]
